# Supplementary material
Source: publisher site journal article supplement (https://www.spandidos-publications.com/6286/downloadSupplementary)
Supplement: Supplementary file 1 [file downloadSupplementary]

## Sheet: Sheet1
Table SXI. Differentially miRNAs in comparison, MHCC97H-RPL9-sh-exosomes vs. MHCC97H-Control-exosomes
Symbol	logFC	P-value	diffState	CT_1	CT_2	CT_3	SH_1	SH_2	SH_3	accession
hsa-miR-24-3p	-0.90613	0.045386	down	2.56584	3.85584	3.42615	2.57044	2.24632	2.31268	MIMAT0000080
hsa-miR-185-5p	-0.84748	0.039288	down	1.76676	0.739412	1.21579	0.283134	0.640631	0.255752	MIMAT0000455
hsa-miR-99b-5p	-0.70103	0.047185	down	1.1295	1.41661	1.72471	0.839058	0.42676	0.901913	MIMAT0000689
hsa-miR-551b-5p	-1.45432	0.003856	down	3.15385	2.83657	3.72935	1.46855	1.66799	2.22026	MIMAT0004794
hsa-miR-1307-3p	1.07458	0.025031	up	2.39623	2.22799	2.47975	2.69035	4.03666	3.6007	MIMAT0005951
hsa-miR-2113	-0.66569	0.04191	down	1.22268	0.957564	0.839058	0.104838	0.442867	0.474512	MIMAT0009206
hsa-miR-3121-3p	-0.77264	0.019327	down	0.940848	1.06866	1.3338	0.405617	0.250447	0.369319	MIMAT0014983
hsa-miR-548u	-1.02336	0.018155	down	1.88051	1.30383	1.83045	0.272937	0.516924	1.15486	MIMAT0015013
hsa-miR-3180-3p	-0.96118	0.037121	down	2.56584	2.25538	3.13615	1.45978	2.28523	1.32881	MIMAT0015058
hsa-miR-4508	-0.709	0.040777	down	8.09664	7.44238	7.64363	7.11018	6.87367	7.07182	MIMAT0019045
hsa-miR-4530	-0.88275	0.026532	down	4.90043	4.02414	4.70156	3.68623	3.47934	3.81231	MIMAT0019069
hsa-miR-4674	-1.31487	0.036061	down	3.27533	4.30373	4.30357	1.66799	2.87357	3.39647	MIMAT0019756
hsa-miR-5189-5p	-0.95896	0.024302	down	2.45507	2.19141	2.96759	1.18811	1.56723	1.98185	MIMAT0021120
hsa-miR-5195-3p	-0.86365	0.021266	down	0.970208	1.36938	1.68864	0.412654	0.345077	0.679546	MIMAT0021127
hsa-miR-5100	-2.17822	6.8e-05	down	4.07003	4.16302	3.82262	1.6532	2.09838	1.76944	MIMAT0022259
hsa-miR-1180-5p	1.44223	0.04243	up	1.25372	1.35905	1.22349	1.75728	2.25767	4.14799	MIMAT0026735
hsa-miR-6807-5p	-1.78699	0.006594	down	3.63275	3.04521	4.19527	2.59279	1.03551	1.88396	MIMAT0027514
hsa-miR-7852-3p	-0.79651	0.045048	down	1.3446	2.01577	1.27686	0.388734	0.806409	1.05256	MIMAT0030427
hsa-miR-8063	-1.27069	0.009695	down	2.57489	2.51294	2.66086	1.04711	2.04693	0.842575	MIMAT0030990
logFC, The base 2 logarithm of fold change; diffstate, differential status; CT, MHCC97H-Control-exosomes; SH, MHCC97H-RPL9-sh-exosome.
